# Supplementary material for: Effect of yttria in Pt/TiO2 on sulfur resistance diesel oxidation catalysts: enhancement of low-temperature activity and stability
Source: Royal Society of Chemistry journal article supplement (doi:10.1039/c4cy00424h), 2014-01-01
Supplement: c4cy00424h1.pdf [file c4cy00424h1.pdf]

## Supporting Information

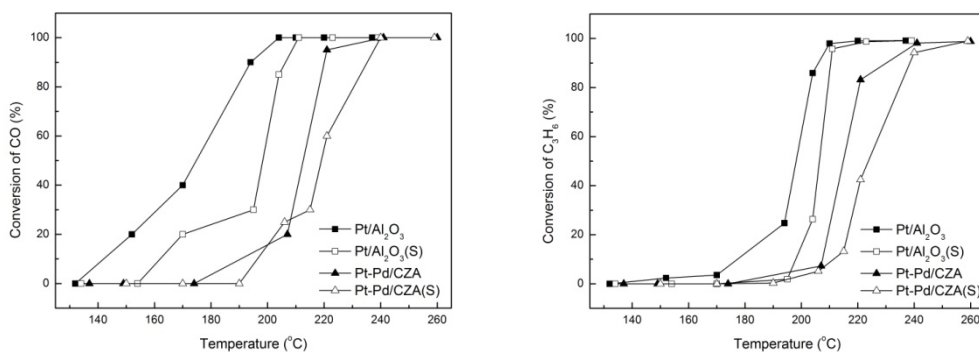

Fig. 1. The CO (left) and C<sub>3</sub>H<sub>6</sub> (right) oxidation conversion over fresh Pt/Al<sub>2</sub>O<sub>3</sub>, Pt-Pd/CZA and sulfur-poisoning treated Pt/Al<sub>2</sub>O<sub>3</sub>(S), Pt-Pd/CZA(S) catalysts.

Reaction conditions: C<sub>3</sub>H<sub>6</sub>: 330 ppm, CO: 1000 ppm, NO: 200 ppm, O<sub>2</sub>: 10%, CO<sub>2</sub>: 8%, vapor: 7%, SO<sub>2</sub>: 50 ppm, N<sub>2</sub>: balance, GHSV = 60,000 h<sup>-1</sup>. All catalysts were pre-treated at 500 °C for 3h under the reaction atmosphere.

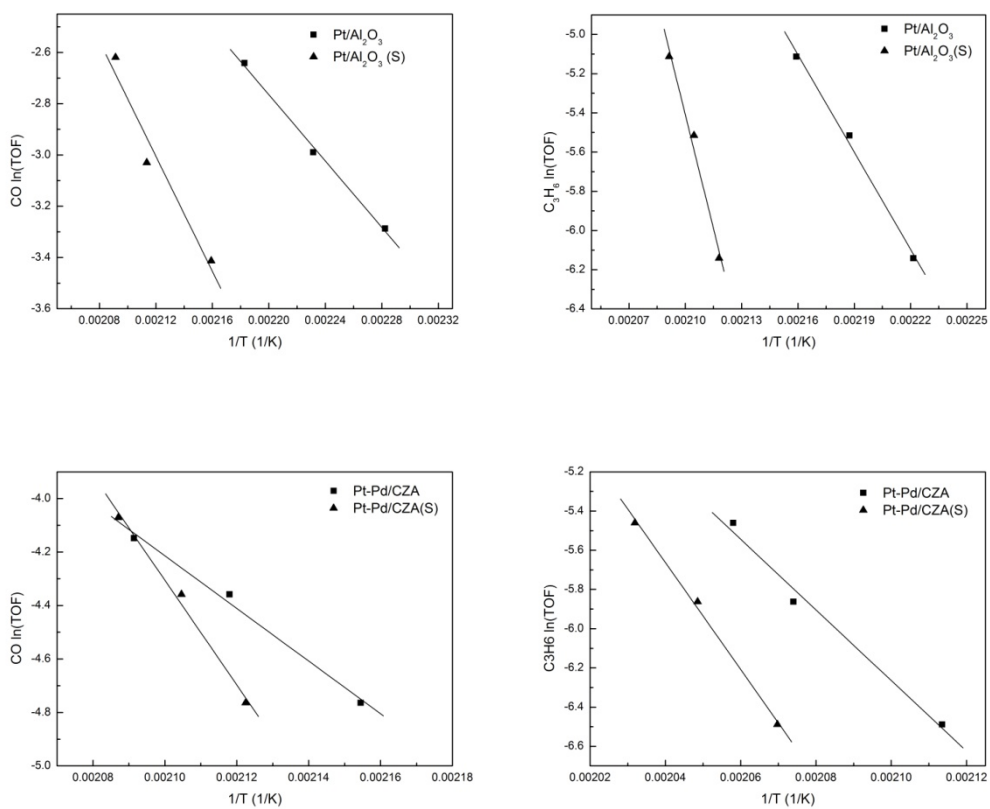

Fig. 2. Arrhenius plots of the turnover frequency (TOF) with respect to the total Pt amount on Pt/Al<sub>2</sub>O<sub>3</sub>, Pt-Pd/CZA, Pt/Al<sub>2</sub>O<sub>3</sub>(S) and Pt-Pd/CZA(S) catalysts.

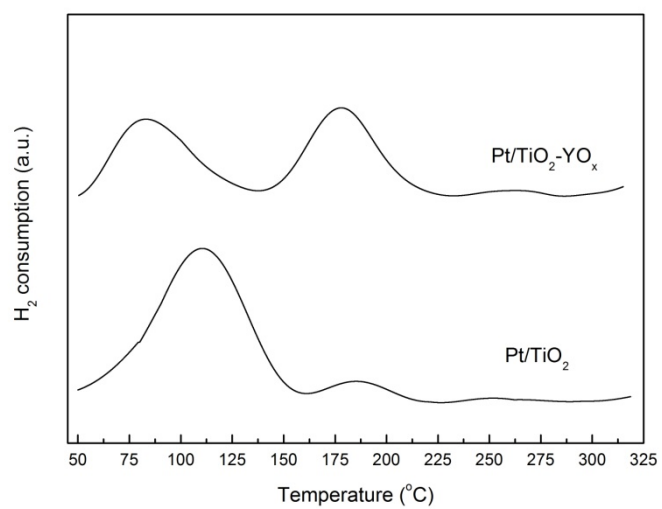

Fig. 3. H<sub>2</sub>-TPR profiles of the Pt/TiO<sub>2</sub> and Pt/TiO<sub>2</sub>-YO<sub>x</sub> catalysts.

Table 1. CO and C<sub>3</sub>H<sub>6</sub> reaction rates and apparent activation energies over Pt/Al<sub>2</sub>O<sub>3</sub>, Pt-Pd/CZA, Pt/Al<sub>2</sub>O<sub>3</sub>(S) and Pt-Pd/CZA(S) catalysts.

| Catalyst                              | Reaction rate (mol g <sup>-1</sup> s <sup>-1</sup> ) |                                                | TOF (s <sup>-1</sup> ) |                                                | Ea (kJ mol <sup>-1</sup> ) |                                                |
|---------------------------------------|------------------------------------------------------|------------------------------------------------|------------------------|------------------------------------------------|----------------------------|------------------------------------------------|
|                                       | CO + O <sub>2</sub>                                  | C <sub>3</sub> H <sub>6</sub> + O <sub>2</sub> | CO + O <sub>2</sub>    | C <sub>3</sub> H <sub>6</sub> + O <sub>2</sub> | CO + O <sub>2</sub>        | C <sub>3</sub> H <sub>6</sub> + O <sub>2</sub> |
| Pt/Al <sub>2</sub> O <sub>3</sub>     | <sup>a</sup> 4.14×10 <sup>-6</sup>                   | <sup>b</sup> 9.21×10 <sup>-7</sup>             | 0.0807 <sup>a</sup>    | 0.0179 <sup>b</sup>                            | 53.9                       | 116.4                                          |
| Pt/Al <sub>2</sub> O <sub>3</sub> (S) | <sup>a</sup> 1.70×10 <sup>-6</sup>                   | <sup>b</sup> 4.99×10 <sup>-7</sup>             | 0.0331 <sup>a</sup>    | 0.0097 <sup>b</sup>                            | 93.1                       | 274.5                                          |
| Pt-Pd/CZA                             | <sup>c</sup> 3.02×10 <sup>-6</sup>                   | <sup>c</sup> 7.39×10 <sup>-7</sup>             | 0.0416 <sup>c</sup>    | 0.0102 <sup>c</sup>                            | 82.8                       | 147.4                                          |
| Pt-Pd/CZA(S)                          | <sup>c</sup> 2.13×10 <sup>-6</sup>                   | <sup>c</sup> 5.54×10 <sup>-7</sup>             | 0.0293 <sup>c</sup>    | 0.0049 <sup>c</sup>                            | 145.7                      | 230.7                                          |

The Pt content of Pt/Al<sub>2</sub>O<sub>3</sub> and Pt/Al<sub>2</sub>O<sub>3</sub>(S) are 5.13×10<sup>-5</sup> mol g<sup>-1</sup>.

The active component content which respect to the total Pt and Pd amount on Pt-Pd/CZA and Pt-Pd/CZA(S) are 7.27×10<sup>-5</sup> mol g<sup>-1</sup>.

Pt-Pd/CZA is the abbreviation of Pt-Pd/CeO<sub>2</sub>-ZrO<sub>2</sub>-Al<sub>2</sub>O<sub>3</sub> catalyst.

<sup>a</sup> Catalyst bed temperature = 190 °C.

<sup>b</sup> Catalyst bed temperature = 210 °C.

<sup>c</sup> Catalyst bed temperature = 220 °C.
